# Supplementary material for: The “StemDif Sensor Test”: A Straightforward, Non-Invasive Assay to Characterize the Secreted Stemness and/or Differentiation Activities of Tumor-Derived Cancer Cell Lines
Source: MDPI journal article supplement (doi:10.3390/biomedicines11123293), 2023-12-13

## Figure S1

List of primers used for RT-qPCR experiments, murine sequences

F: Forward: 5'

R: Reverse: 5'

Size amplicon

### Reference gene:

|           |        |                       |     |
|-----------|--------|-----------------------|-----|
| nm_013556 | Hprt F | TCAGTCAACGGGGGACATAAA | 142 |
|           | Hprt R | GGGGCTGTACTGCTTAACCAG |     |

### Stemness genes

|              |            |                         |     |
|--------------|------------|-------------------------|-----|
| nm_013633    | Oct4 F     | GAGGAGTCCCAGGACATGAA    | 153 |
|              | Oct4 R     | AGATGGTGGTCTGGCTGAAC    |     |
| nm_011443    | Sox2 F     | GCGGAGTGGAACTTTTGTCC    | 156 |
|              | Sox2 R     | GGGAAGCGTGTACTTATCCTTCT |     |
| nm_028016    | Nanog F    | TCTTCCTGGTCCCCACAGTTT   | 100 |
|              | Nanog R    | GCAAGAATAGTTCTCGGGATGAA |     |
| nm_011934    | Esrrb F    | ACACTTGGGGACCAGATGAG    | 150 |
|              | Esrrb R    | CCTACCAGGCGAGAGTGTTT    |     |
| X15351       | Ceacam 1 F | ACTATCGTCGTA CT CAGGCGA | 98  |
|              | Ceacam 1 R | GTCACCTCCACGGGATTG      |     |
| nm_008624    | Mras F     | TGTTCCAAGTGA AACCTTCCC  | 117 |
|              | Mras R     | GGGTCGTAGTCAGGCACAA     |     |
| nm_010637    | Klf4 F     | TATACATTCCGCCACAGCAG    | 136 |
|              | Klf4 R     | TCTGGGCTTCCTTTGCTAAC    |     |
| nm_009769    | Klf5 F     | ACCTTACAGCATCAACATGAACG | 123 |
|              | Klf5 R     | TGGCTGAAAATGGTAACAGGTT  |     |
| nm_028679    | Irak3 F    | ACATGGGGCATCAACGAGC     | 231 |
|              | Irak3 R    | GGAAGCTGATAGGGGTTTTCTG  |     |
| NC-000074    | Rex1 F     | CCCTCGACAGACTGACCCTAA   | 100 |
|              | Rex1 R     | TCGGGGCTAATCTCACTTTCAT  |     |
| nm_010291    | Gjb5 F     | CCAAGCCCTCCGAGAAAAACA   | 107 |
|              | Gjb5 R     | ACACCGCTTAATCACTAGGTAGA |     |
| nm_023844    | Jam2 F     | GTGCCCATTCTGTTATGACTG   | 113 |
|              | Jam2 R     | TTCCCTAGCAA ACTTGTGCCA  |     |
| nm_001042659 | Fzd5 F     | TCTTGTCTGCGTGCTACCTG    | 167 |
|              | Fzd5 R     | GGCCATGCCAAAGAAATAGA    |     |
| nm_001160012 | Gjb3 F     | TGGTGGACCTACTTGT TTAGCC | 155 |
|              | Gjb3 R     | CTGGCGCACTGTACCAGAC     |     |
| nm_007657    | CD9 F      | GACTATGGCTCCGATTCTGACT  | 101 |
|              | CD9 R      | CCCGGCTCCAATCAGAATGT    |     |
| nm_010493    | Icam1 F    | GTGATGCTCAGGTATCCATCCA  | 213 |
|              | Icam1 R    | CACAGTTCTCAAAGCACAGCG   |     |

**Differentiation genes**

|           |          |                          |     |
|-----------|----------|--------------------------|-----|
| nm_010703 | Lef1 F   | AAGAAATGAGAGAGCGAATGTCGT | 244 |
|           | Lef1 R   | TTCTGGGACCTGTACCTGAAGT   |     |
| nm_007607 | Car4 F   | GACAACGGTTCAGAGCACAG     | 155 |
|           | Car4 R   | AAGCCCTTGTTACCTTGTC      |     |
| nm_016701 | Nestin F | AGAATGTGCAGTCACCAAGG     | 138 |
|           | Nestin R | GGGTCTCATTTTCAGGTGGGT    |     |
| nm_011441 | Sox17 F  | GATGCGGGATACGCCAGTG      | 136 |
|           | Sox17 R  | CCACCACCTCGCCTTTCAC      |     |
| nm_029357 | Pcdh1 F  | GCTCCGTATCTTCGAGTGGAT    | 97  |
|           | Pcdh1 R  | GGATCTGGTTCTGGCATTAC     |     |
| nm_011441 | Brach F  | GCTTCAAGGAGCTAACTAACGAG  | 117 |
|           | Brach R  | CCAGCAAGAAAGAGTACATGGGC  |     |
| nm_010203 | Fgf5 F   | GAAAAGACAGGCCGAGAGTG     | 102 |
|           | Fgf5 R   | GAAGTGGGTGGAGACGTGTT     |     |
| nm_008057 | Fzd7 F   | TGTGTCTCTTTTCGCATCC      | 155 |
|           | Fzd7 R   | GGAAGGCCTGCTCATAAAAG     |     |

**Figure S2**

GENE Expression of mESCs with GICs CM.

**Experiments 1 to 3 performed with the same CMs on independent experiments****Experiment 1**

EXPRESSION of a selection of stemness and differentiation (Dif.) genes in different media:

SR: Serum replacement medium; NS34: medium adult GICs; Nsah: medium pediatric GICs

|            | <b>MEAN</b> |                |              |              |              |              |                       |
|------------|-------------|----------------|--------------|--------------|--------------|--------------|-----------------------|
|            | <b>mras</b> | <b>ceacam1</b> | <b>esrrb</b> | <b>irak3</b> | <b>oct4</b>  | <b>nanog</b> | <b>Stemness genes</b> |
| SR+LIF     | 100         | 100            | 100          | 100          | 100          | 100          | 100                   |
| SR-LIFd5   | 37          | 83             | 41           | 39           | 143          | 134          | 79                    |
| NS34+LIF   | 188         | 383            | 226          | 231          | 169          | 168          | 228                   |
| NS34-LIFd5 | 96          | 31             | 7            | 35           | 98           | 37           | 50                    |
| Nsah+LIF   | 419         | 896            | 192          | 578          | 147          | 517          | 458                   |
| Nsah-LIFd5 | 78          | 21             | 3            | 46           | 65           | 49           | 44                    |
|            | <b>lef1</b> | <b>car4</b>    | <b>pak1</b>  | <b>fzd7</b>  | <b>pdch1</b> |              | <b>Dif. genes</b>     |
| SR+lif     | 100         | 100            | 100          | 100          | 100          |              | 100                   |
| SR-LIFd5   | 316         | 847            | 392          | 235          | 991          |              | 556                   |
| NS34+lif   | 235         | 300            | 129          | 146          | 373          |              | 237                   |
| NS34-LIFd5 | 533         | 1549           | 476          | 423          | 1547         |              | 905                   |
| Nsah+lif   | 241         | 566            | 152          | 174          | 615          |              | 350                   |
| Nsah-LIFd5 | 872         | 2194           | 483          | 408          | 1980         |              | 1187                  |

EXPRESSION of a selection of stemness and differentiation genes in Adult GICs

|            | <b>mras</b> | <b>ceacam</b> | <b>esrrb</b> | <b>irak3</b> | <b>oct4</b>  | <b>nanog</b> | <b>Stemness genes</b> |
|------------|-------------|---------------|--------------|--------------|--------------|--------------|-----------------------|
| NS34+lif   | 100         | 100           | 100          | 100          | 100          | 100          | 100                   |
| NS34-LIFd5 | 51          | 8             | 3            | 15           | 58           | 22           | 26                    |
| OB1        | 100         | 48            | 72           | 49           | 68           | 226          | 94                    |
| TG1        | 73          | 68            | 78           | 52           | 71           | 131          | 79                    |
| TG10       | 66          | 133           | 90           | 79           | 92           | 200          | 110                   |
|            | <b>lef1</b> | <b>car4</b>   | <b>pak1</b>  | <b>fzd7</b>  | <b>pdch1</b> |              | <b>Dif. genes</b>     |
| NS34+lif   | 100         | 100           | 100          | 100          | 100          |              | 100                   |
| NS34-LIFd5 | 227         | 516           | 369          | 289          | 415          |              | 363                   |
| OB1        | 3           | 73            | 43           | 34           | 20           |              | 34                    |
| TG1        | 108         | 137           | 102          | 121          | 74           |              | 109                   |
| TG10       | 160         | 373           | 124          | 125          | 125          |              | 182                   |

EXPRESSION of a selection of stemness and differentiation genes in Pediatric GICs

|          | <b>mras</b> | <b>ceacam</b> | <b>esrrb</b> | <b>irak3</b> | <b>oct4</b> | <b>nanog</b> | <b>Stemness genes</b> |
|----------|-------------|---------------|--------------|--------------|-------------|--------------|-----------------------|
| Nsah+lif | 100         | 100           | 100          | 100          | 100         | 100          | 100                   |
| Nsah     | 19          | 2             | 2            | 8            | 44          | 9            | 14                    |
| TP84     | 6           | 21            | 6            | 14           | 51          | 39           | 23                    |
| TP83     | 4           | 4             | 12           | 5            | 64          | 10           | 16                    |
| TP80     | 7           | 7             | 6            | 12           | 70          | 8            | 18                    |

|          | <b>lef1</b> | <b>car4</b> | <b>pak1</b> | <b>fzd7</b> | <b>pdch1</b> | <b>Dif. genes</b> |
|----------|-------------|-------------|-------------|-------------|--------------|-------------------|
| Nsah+lif | 100         | 100         | 100         | 100         | 100          | 100               |
| Nsah     | 362         | 387         | 318         | 234         | 322          | 325               |
| TP84     | 319         | 648         | 101         | 8           | 316          | 279               |
| TP83     | 147         | 325         | 110         | 185         | 122          | 178               |
| TP80     | 317         | 379         | 132         | 77          | 139          | 209               |

## Experiment 2

EXPRESSION of a selection of differentiation genes in Adult GICs

|          | <b>lef1</b> | <b>car4</b> | <b>pak1</b> | <b>nestin</b> | <b>brach</b> | <b>fgf5</b> | <b>frzd7</b> | <b>pdch1</b> | <b>MEAN<br/>Dif. genes</b> |
|----------|-------------|-------------|-------------|---------------|--------------|-------------|--------------|--------------|----------------------------|
| NS34+lif | 100         | 100         | 100         | 100           | 100          | 100         | 100          | 100          | 100                        |
| NS34     | 560         | 280         | 358         | 290           | 256          | 655         | 260          | 379          | 380                        |
| OB1      | 95          | 5           | 62          | 46            | 8            | 3           | 35           | 69           | 40                         |
| TG1      | 142         | 134         | 102         | 56            | 115          | 100         | 94           | 63           | 101                        |
| TG10     | 380         | 169         | 108         | 39            | 130          | 161         | 108          | 195          | 161                        |

EXPRESSION of a selection of differentiation genes in Pediatric GICs

|          | <b>lef1</b> | <b>car4</b> | <b>pak1</b> | <b>nestin</b> | <b>brach</b> | <b>fgf5</b> | <b>frzd7</b> | <b>pdch1</b> | <b>Dif. genes</b> |
|----------|-------------|-------------|-------------|---------------|--------------|-------------|--------------|--------------|-------------------|
| Nsah+lif | 100         | 100         | 100         | 100           | 100          | 100         | 100          | 100          | 100               |
| Nsah     | 461         | 413         | 466         | 383           | 162          | 446         | 1607         | 589          | 566               |
| TP84     | 234         | 86          | 47          | 204           | 28           | 633         | 8            | 141          | 173               |
| TP83     | 439         | 179         | 141         | 403           | 116          | 629         | 1008         | 170          | 386               |
| TP80     | 437         | 267         | 121         | 99            | 801          | 286         | 189          | 409          | 326               |

### Experiment 3

EXPRESSION of a selection of stemness and differentiation (dif.) genes in different media:

SR: Serum replacement medium; NS34: medium for adult GICs; Nsah: medium for pediatric GICs

|          | <b>gjb3</b> | <b>gjb5</b> | <b>jam2</b> | <b>fzd5</b> | <b>icam1</b> | <b>cd9</b> | <b>MEAN</b>           |
|----------|-------------|-------------|-------------|-------------|--------------|------------|-----------------------|
|          |             |             |             |             |              |            | <b>Stemness genes</b> |
| SR+lif   | 100         | 100         | 100         | 100         | 100          | 100        | 100                   |
| SR       | 30          | 64          | 35          | 48          | 29           | 84         | 48                    |
| NS34+lif | 184         | 218         | 206         | 140         | 80           | 207        | 173                   |
| NS34     | 27          | 82          | 35          | 209         | 17           | 166        | 89                    |
| Nsah+lif | 314         | 1171        | 251         | 75          | 168          | 334        | 385                   |
| Nsah     | 20          | 126         | 28          | 178         | 16           | 183        | 92                    |

|          | <b>rex1</b> | <b>sox2</b> | <b>klf4</b> | <b>klf5</b> |  |  | <b>Stemness genes</b> |
|----------|-------------|-------------|-------------|-------------|--|--|-----------------------|
| SR+lif   | 100         | 100         | 100         | 100         |  |  | 100                   |
| SR       | 35          | 59          | 17          | 31          |  |  | 35                    |
| NS34+lif | 167         | 151         | 177         | 179         |  |  | 169                   |
| NS34     | 9           | 152         | 55          | 34          |  |  | 62                    |
| Nsah+lif | 114         | 119         | 257         | 476         |  |  | 242                   |
| Nsah     | 3           | 116         | 54          | 46          |  |  | 55                    |

|          | <b>gjb3</b> | <b>gjb5</b> | <b>jam2</b> | <b>fzd5</b> | <b>icam1</b> | <b>cd9</b> | <b>Stemness genes</b> |
|----------|-------------|-------------|-------------|-------------|--------------|------------|-----------------------|
| NS34+lif | 100         | 100         | 100         | 100         | 100          | 100        | 100                   |
| NS34     | 14          | 38          | 17          | 149         | 21           | 80         | 53                    |
| OB1      | 189         | 187         | 131         | 83          | 67           | 151        | 135                   |
| TG1      | 63          | 48          | 83          | 70          | 100          | 86         | 75                    |
| TG10     | 70          | 103         | 72          | 62          | 151          | 106        | 94                    |

|          | <b>rex1</b> | <b>sox2</b> | <b>klf4</b> | <b>klf5</b> |  |  | <b>Stemness genes</b> |
|----------|-------------|-------------|-------------|-------------|--|--|-----------------------|
| NS34+lif | 100         | 100         | 100         | 100         |  |  | 100                   |
| NS34     | 5           | 101         | 31          | 19          |  |  | 39                    |
| OB1      | 116         | 91          | 170         | 77          |  |  | 113                   |
| TG1      | 82          | 87          | 54          | 71          |  |  | 73                    |
| TG10     | 90          | 84          | 83          | 93          |  |  | 87                    |

|          | <b>gjb3</b> | <b>gjb5</b> | <b>jam2</b> | <b>fzd5</b> | <b>icam1</b> | <b>cd9</b> | <b>Stemness genes</b> |
|----------|-------------|-------------|-------------|-------------|--------------|------------|-----------------------|
| Nsah+lif | 100         | 100         | 100         | 100         | 100          | 100        | 100                   |
| Nsah     | 7           | 11          | 11          | 236         | 9            | 55         | 55                    |
| TP84     | 11          | 21          | 16          | 14          | 4            | 32         | 16                    |
| TP83     | 6           | 3           | 9           | 73          | 12           | 19         | 20                    |
| TP80     | 4           | 16          | 3           | 10          | 12           | 29         | 12                    |

|          | <b>rex1</b> | <b>sox2</b> | <b>klf4</b> | <b>klf5</b> | <b>Stemness genes</b> |
|----------|-------------|-------------|-------------|-------------|-----------------------|
| Nsah+lif | 100         | 100         | 100         | 100         | 100                   |
| Nsah     | 2           | 98          | 21          | 10          | 33                    |
| TP84     | 10          | 15          | 1           | 28          | 14                    |
| TP83     | 6           | 35          | 3           | 6           | 13                    |
| TP80     | 1           | 18          | 8           | 18          | 11                    |

## Experiments 4 and 5 performed with another set of CMs on independent experiments

### Experiment 4

|          | <b>oct4</b> | <b>nanog</b> | <b>klf4</b> | <b>ceacam</b> | <b>irak3</b> | <b>rex1</b> | <b>MEAN<br/>Stemness genes</b> |
|----------|-------------|--------------|-------------|---------------|--------------|-------------|--------------------------------|
| SR+lif   | 100         | 100          | 100         | 100           | 100          | 100         | 100                            |
| SR-LIFd5 | 20          | 54           | 59          | 25            | 39           | 10          | 34                             |
| NS34+lif | 23          | 171          | 164         | 45            | 138          | 39          | 97                             |
| NS34     | 1           | 15           | 147         | 9             | 35           | 2           | 35                             |
| Nsah+lif | 43          | 204          | 177         | 44            | 112          | 68          | 108                            |
| Nsah     | 7           | 53           | 65          | 8             | 29           | 11          | 29                             |

|            | <b>oct4</b> | <b>nanog</b> | <b>klf4</b> | <b>ceacam</b> | <b>irak3</b> | <b>rex1</b> | <b>Stemness<br/>genes</b> |
|------------|-------------|--------------|-------------|---------------|--------------|-------------|---------------------------|
| SR+lif     | 100         | 100          | 100         | 100           | 100          | 100         | 100                       |
| SR-LIFd5   | 20          | 54           | 59          | 25            | 39           | 10          | 34                        |
| NS34+lif   | 23          | 171          | 164         | 45            | 138          | 39          | 97                        |
| NS34-LIFd5 | 1           | 15           | 147         | 9             | 35           | 2           | 35                        |
| OB1        | 36          | 467          | 128         | 135           | 143          | 91          | 167                       |
| TG1        | 15          | 75           | 44          | 19            | 49           | 20          | 37                        |
| TG10       | 28          | 211          | 135         | 44            | 99           | 27          | 91                        |

|            | <b>oct4</b> | <b>nanog</b> | <b>klf4</b> | <b>ceacam</b> | <b>irak3</b> | <b>rex1</b> | <b>Stemness genes</b> |
|------------|-------------|--------------|-------------|---------------|--------------|-------------|-----------------------|
| SR+lif     | 100         | 100          | 100         | 100           | 100          | 100         | 100                   |
| SR-LIFd5   | 20          | 54           | 59          | 25            | 39           | 10          | 34                    |
| Nsah+lif   | 43          | 204          | 177         | 44            | 112          | 68          | 108                   |
| Nsah-LIFd5 | 7           | 53           | 65          | 8             | 29           | 11          | 29                    |
| TP84       | 28          | 163          | 62          | 38            | 30           | 30          | 59                    |
| TP83       | 26          | 7            | 38          | 10            | 18           | 1           | 17                    |
| TP80       | 9           | 15           | 108         | 31            | 43           | 4           | 35                    |

|                 | <b>nestin</b> | <b>brach</b> | <b>fdz7</b> | <b>pcdh1</b> | <b>fgf5</b> | <b>lef1</b> | <b>Dif. genes</b> |
|-----------------|---------------|--------------|-------------|--------------|-------------|-------------|-------------------|
| <b>SR+lif</b>   | 100           | 100          | 100         | 100          | 100         | 100         | 100               |
| <b>SR-LIFd5</b> | 484           | 1383         | 376         | 350          | 799         | 95          | 581               |
| NS34+lif        | 653           | 24           | 161         | 341          | 72          | 78          | 221               |
| NS34-LIFd5      | 2510          | 12           | 267         | 242          | 29          | 169         | 538               |
| Nsah+lif        | 354           | 16           | 118         | 142          | 189         | 42          | 143               |
| Nsah-LIFd5      | 641           | 102          | 114         | 97           | 200         | 157         | 219               |

|                 | <b>nestin</b> | <b>brach</b> | <b>fdz7</b> | <b>pcdh1</b> | <b>fgf5</b> | <b>lef1</b> | <b>Dif. genes</b> |
|-----------------|---------------|--------------|-------------|--------------|-------------|-------------|-------------------|
| <b>SR+lif</b>   | 100           | 100          | 100         | 100          | 100         | 100         | 100               |
| <b>SR-LIFd5</b> | 484           | 1383         | 376         | 350          | 799         | 95          | 581               |
| NS34+lif        | 653           | 24           | 161         | 341          | 72          | 78          | 221               |
| NS34-LIFd5      | 2510          | 12           | 267         | 242          | 29          | 169         | 538               |
| OB1             | 74            | 22           | 43          | 680          | 52          | 8           | 146               |
| TG1             | 439           | 54           | 194         | 197          | 305         | 108         | 216               |
| TG10            | 1057          | 61           | 388         | 531          | 1237        | 129         | 567               |

|                 | <b>nestin</b> | <b>brach</b> | <b>fdz7</b> | <b>pcdh1</b> | <b>fgf5</b> | <b>lef1</b> | <b>Dif. genes</b> |
|-----------------|---------------|--------------|-------------|--------------|-------------|-------------|-------------------|
| <b>SR+lif</b>   | 100           | 100          | 100         | 100          | 100         | 100         | 100               |
| <b>SR-LIFd5</b> | 484           | 1383         | 376         | 350          | 799         | 95          | 581               |
| Nsah+lif        | 354           | 16           | 118         | 142          | 189         | 42          | 143               |
| Nsah-LIFd5      | 641           | 102          | 114         | 97           | 200         | 157         | 219               |
| TP84            | 1274          | 66           | 197         | 333          | 794         | 85          | 458               |
| TP83            | 1746          | 123          | 190         | 397          | 528         | 134         | 520               |
| TP80            | 1535          | 117          | 320         | 286          | 236         | 275         | 462               |

## Experiment 5

|               | <b>sox2</b> | <b>klf5</b> | <b>esrrb</b> | <b>mras</b> | <b>Stemness genes</b> |
|---------------|-------------|-------------|--------------|-------------|-----------------------|
| <b>SR+lif</b> | 100         | 100         | 100          | 100         | 100                   |
| <b>SR</b>     | 73          | 26          | 9            | 34          | 35                    |
| NS34+lif      | 126         | 84          | 102          | 187         | 125                   |
| NS34          | 233         | 71          | 4            | 199         | 127                   |
| Nsah+lif      | 123         | 76          | 114          | 103         | 104                   |
| Nsah          | 128         | 41          | 14           | 110         | 73                    |



|               | <b>sox2</b> | <b>klf5</b> | <b>esrrb</b> | <b>mras</b> | <b>Stemness genes</b> |
|---------------|-------------|-------------|--------------|-------------|-----------------------|
| <b>SR+lif</b> | 100         | 100         | 100          | 100         | 100                   |
| <b>SR</b>     | 73          | 26          | 9            | 34          | 35                    |
| OB1           | 95          | 100         | 166          | 164         | 131                   |
| TG1           | 85          | 40          | 25           | 88          | 59                    |
| TG10          | 188         | 96          | 80           | 114         | 120                   |

|               | <b>sox2</b> | <b>klf5</b> | <b>esrrb</b> | <b>mras</b> | <b>Stemness genes</b> |
|---------------|-------------|-------------|--------------|-------------|-----------------------|
| <b>SR+lif</b> | 100         | 100         | 100          | 100         | 100                   |
| <b>SR</b>     | 73          | 26          | 9            | 34          | 35                    |
| TP84          | 95          | 42          | 53           | 51          | 60                    |
| TP83          | 74          | 23          | 2            | 83          | 46                    |
| TP80          | 104         | 30          | 5            | 107         | 61                    |

|               | <b>sox2</b> | <b>klf5</b> | <b>esrrb</b> | <b>mras</b> | <b>Stemness genes</b> |
|---------------|-------------|-------------|--------------|-------------|-----------------------|
| <b>SR+lif</b> | 100         | 100         | 100          | 100         | 100                   |
| <b>SR</b>     | 73          | 26          | 9            | 34          | 35                    |
| NS34+lif      | 126         | 84          | 102          | 187         | 125                   |
| NS34          | 233         | 71          | 4            | 199         | 127                   |
| Nsah+lif      | 123         | 76          | 114          | 103         | 104                   |
| Nsah          | 128         | 41          | 14           | 110         | 73                    |

|               | <b>Fgf5</b> | <b>Lef1</b> | <b>Dif. genes</b> |
|---------------|-------------|-------------|-------------------|
| <b>SR+lif</b> | 100         | 100         | 100               |
| <b>SR</b>     | 293         | 43          | 168               |
| NS34+lif      | 98          | 71          | 85                |
| NS34          | 57          | 193         | 125               |
| Nsah+lif      | 142         | 28          | 85                |
| Nsah          | 199         | 143         | 171               |

|               | <b>Fgf5</b> | <b>Lef1</b> | <b>Dif. genes</b> |
|---------------|-------------|-------------|-------------------|
| <b>SR+lif</b> | 100         | 100         | 100               |
| <b>SR</b>     | 293         | 43          | 168               |
| OB1           | 64          | 7           | 35                |
| TG1           | 371         | 121         | 246               |
| TG10          | 1190        | 144         | 667               |

|               | <b>Fgf5</b> | <b>Lef1</b> | <b>Dif. genes</b> |
|---------------|-------------|-------------|-------------------|
| <b>SR+lif</b> | 100         | 100         | 100               |
| <b>SR</b>     | 293         | 43          | 168               |
| TP84          | 627         | 91          | 359               |
| TP83          | 751         | 166         | 459               |
| TP80          | 149         | 166         | 158               |

**Figure S3**

Gene expression of mESCs with Gastric CM

**All experiments were done with independant CM of the various gastric cancer stem cells**

Conditionned medium of Gastric cancer stem cells grown for 48h has been incubated with mESCs for 5 days

RNA prep analysed with various set of stemness or differentiated genes

**Experiment 1****MEAN  
Stemness genes**

|            | <b>oct4</b> | <b>nanog</b> | <b>ceacam1</b> | <b>klf4</b> | <b>irak3</b> | <b>rex1</b> | <b>klf5</b> | <b>sox2</b> | <b>esrrb</b> |
|------------|-------------|--------------|----------------|-------------|--------------|-------------|-------------|-------------|--------------|
| SR+LIF     | 100         | 100          | 100            | 100         | 100          | 100         | 100         | 100         | 100          |
| SR-LIF, d5 | 31          | 70           | 18             | 2           | 79           | 21          | 6           | 81          | 9            |
| MNK45      | 105         | 140          | 67             | 67          | 88           | 95          | 32          | 152         | 51           |
| MNK74      | 120         | 64           | 63             | 30          | 38           | 75          | 29          | 166         | 74           |
| NCI 87     | 78          | 170          | 125            | 47          | 52           | 82          | 52          | 89          | 89           |

|            | <b>lef1</b> | <b>nestin</b> | <b>brach</b> | <b>fdz7</b> | <b>pcdh1</b> | <b>sox17</b> | <b>Dif. genes</b> |
|------------|-------------|---------------|--------------|-------------|--------------|--------------|-------------------|
| SR+LIF     | 100         | 100           | 100          | 100         | 100          | 100          | 100               |
| SR-LIF, d5 | 42          | 160           | 370          | 30          | 156          | 53           | 135               |
| MNK45      | 99          | 66            | 148          | 31          | 19           | 183          | 91                |
| MNK74      | 451         | 43            | 233          | 52          | 363          | 305          | 241               |
| NCI 87     | 685         | 569           | 155          | 187         | 248          | 537          | 397               |

**Experiment 2**

|            | <b>oct4</b> | <b>nanog</b> | <b>ceacam1</b> | <b>klf4</b> | <b>irak3</b> | <b>rex1</b> | <b>Stemness genes</b> |
|------------|-------------|--------------|----------------|-------------|--------------|-------------|-----------------------|
| SR+lif     | 100         | 100          | 100            | 100         | 100          | 100         | 100                   |
| SR-LIF, d5 | 28          | 53           | 47             | 14          | 38           | 7           | 31                    |
| MKN7       | 69          | 265          | 25             | 50          | 131          | 27          | 94                    |
| MKN45      | 157         | 1082         | 307            | 286         | 200          | 160         | 365                   |
| MKN74      | 97          | 546          | 175            | 91          | 201          | 64          | 196                   |

|            | <b>nestin</b> | <b>brach</b> | <b>pcdh1</b> | <b>sox17</b> | <b>lef1</b> |  | <b>Dif. genes</b> |
|------------|---------------|--------------|--------------|--------------|-------------|--|-------------------|
| SR+lif     | 100           | 100          | 100          | 100          | 100         |  | 100               |
| SR-LIF, d5 | 533           | 1843         | 305          | 548          | 84          |  | 663               |
| MKN7       | 428           | 1711         | 374          | 96           | 55          |  | 533               |
| MKN45      | 120           | 45           | 575          | 176          | 13          |  | 186               |
| MKN74      | 239           | 21           | 355          | 66           | 35          |  | 143               |

### Experiment 3

|            | <b>oct4</b> | <b>sox2</b> | <b>nanog</b> | <b>mras</b> | <b>ceacam1</b> | <b>esrrb</b> | <b>klf4</b> | <b>klf5</b> | <b>rex1</b> | <b>Stemness genes</b> |
|------------|-------------|-------------|--------------|-------------|----------------|--------------|-------------|-------------|-------------|-----------------------|
| SR+lif     | 100         | 100         | 100          | 100         | 100            | 100          | 100         | 100         | 100         | 100                   |
| SR-LIF, d5 | 108         | 57          | 60           | 13          | 24             | 7            | 11          | 79          | 2           | 40                    |
| MKN7       | 106         | 104         | 86           | 36          | 70             | 369          | 81          | 192         | 24          | 119                   |
| MKN28      | 198         | 225         | 223          | 213         | 334            | 708          | 129         | 310         | 102         | 271                   |
| MKN45      | 87          | 22          | 22           | 18          | 46             | 47           | 5           | 89          | 23          | 40                    |
| MKN74      | 91          | 38          | 47           | 71          | 145            | 76           | 26          | 105         | 89          | 77                    |

|            | <b>pcdh1</b> | <b>nestin</b> | <b>brach</b> | <b>sox17</b> | <b>lef1</b> |  | <b>Dif. genes</b> |
|------------|--------------|---------------|--------------|--------------|-------------|--|-------------------|
| SR+lif     | 100          | 100           | 100          | 100          | 100         |  | 100               |
| SR-LIF, d5 | 1180         | 3558          | 5541         | 97           | 386         |  | 2152              |
| MKN7       | 870          | 925           | 751          | 203          | 2900        |  | 1130              |
| MKN45      | 256          | 711           | 663          | 35           | 651         |  | 463               |
| MKN28      | 720          | 667           | 1488         | 311          | 1966        |  | 1030              |
| MKN74      | 63           | 190           | 240          | 59           | 862         |  | 283               |

### Experiment 4

|            | <b>oct4</b> | <b>nanog</b> | <b>sox2</b> | <b>rex1</b> | <b>mras</b> | <b>klf4</b> | <b>klf5</b> | <b>ceacam1</b> | <b>esrrb</b> | <b>Stemness genes</b> |
|------------|-------------|--------------|-------------|-------------|-------------|-------------|-------------|----------------|--------------|-----------------------|
| SR+lif     | 100         | 100          | 100         | 100         | 100         | 100         | 100         | 100            | 100          | 100                   |
| SR-LIF, d5 | 16          | 19           | 20          | 6           | 10          | 13          | 27          | 13             | 3            | 14                    |
| AGS        | 90          | 377          | 264         | 169         | 101         | 305         | 201         | 150            | 318          | 220                   |
| NCI 87     | 94          | 277          | 155         | 115         | 226         | 143         | 97          | 265            | 130          | 167                   |

|            | <b>lef1</b> | <b>pcdh1</b> | <b>nestin</b> | <b>brach</b> | <b>Dif. genes</b> |
|------------|-------------|--------------|---------------|--------------|-------------------|
| SR+lif     | 100         | 100          | 100           | 100          | 100               |
| SR-LIF, d5 | 23          | 105          | 90            | 107          | 81                |
| AGS        | 23          | 23           | 157           | 215          | 105               |
| NCI 87     | 67          | 227          | 280           | 239          | 203               |

## Experiment 5

|            | <b>Oct4</b> | <b>Sox2</b> | <b>Nanog</b> | <b>Ceacam1</b> | <b>Esrrb</b> | <b>Mras</b> | <b>Klf4</b> | <b>Klf5</b> | <b>Rex1</b> | <b>Stemness genes</b> |
|------------|-------------|-------------|--------------|----------------|--------------|-------------|-------------|-------------|-------------|-----------------------|
| SR+lif     | 100         | 100         | 100          | 100            | 100          | 100         | 100         | 100         | 100         | 100                   |
| SR-LIF, d5 | 72          | 84          | 25           | 47             | 33           | 56          | 43          | 23          | 59          | 49                    |
| MKN7       | 207         | 167         | 116          | 190            | 143          | 241         | 175         | 119         | 148         | 167                   |
| MKN45      | 210         | 192         | 164          | 236            | 202          | 134         | 138         | 106         | 129         | 168                   |
| MKN28      | 79          | 51          | 44           | 225            | 88           | 192         | 176         | 27          | 70          | 106                   |
| MKN74      | 85          | 133         | 120          | 223            | 217          | 890         | 754         | 311         | 146         | 320                   |

  

|            | <b>Lef1</b> | <b>Brach</b> | <b>Car4</b> | <b>Nestin</b> | <b>Sox17</b> | <b>Dif. genes</b> |
|------------|-------------|--------------|-------------|---------------|--------------|-------------------|
| SR+lif     | 100         | 100          | 100         | 100           | 100          | 100               |
| SR-LIF, d5 | 863         | 933          | 520         | 902           | 341          | 712               |
| MKN7       | 487         | 6730         | 404         | 1136          | 200          | 1791              |
| MKN45      | 684         | 1469         | 2052        | 1233          | 1352         | 1358              |
| MKN28      | 90          | 2193         | 302         | 1328          | 135          | 810               |
| MKN74      | 116         | 347          | 697         | 1936          | 575          | 734               |

**Figure S4:** Uncropped western blots corresponding to Figure 3.

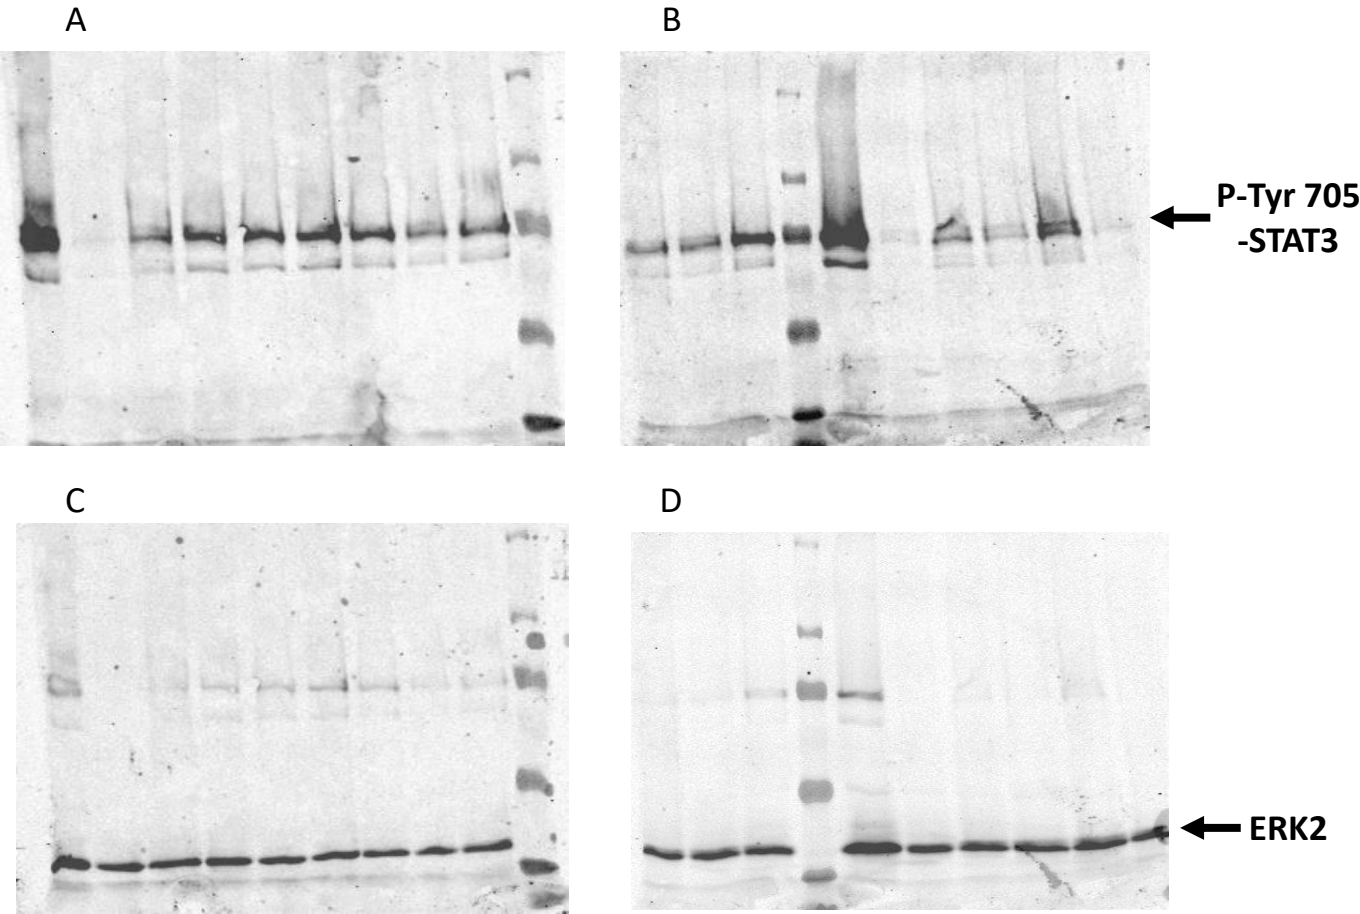

Supplement: s1 [file s1]
